# Supplementary material
Source: Elsevier journal article supplement (https://lshtm-eprints-repo-prod.lshtm-eprints.cdl.cosector.com/2338161/1/mmc1.pdf)

| <b>Pneumonia</b> |                |                     |                                 |                                 | <b>Median</b> |
|------------------|----------------|---------------------|---------------------------------|---------------------------------|---------------|
| <b>Year</b>      | <b>Funding</b> | <b>Publications</b> | <b>Likely publication yield</b> | <b>UK pound per publication</b> |               |
| 1997             | £611,493       | 250                 | 1150                            | £532                            | £779          |
| 1998             | £1,794,230     | 250                 | 1250                            | £1,435                          |               |
| 1999             | £896,453       | 242                 | 1463                            | £613                            |               |
| 2000             | £3,719,166     | 348                 | 1581                            | £2,352                          |               |
| 2001             | £1,264,689     | 310                 | 1732                            | £730                            |               |
| 2002             | £1,332,194     | 350                 | 1902                            | £700                            |               |
| 2003             | £1,853,285     | 455                 | 1997                            | £928                            |               |
| 2004             | £239,056       | 466                 | 2069                            | £116                            |               |
| 2005             | £5,431,788     | 461                 | 2268                            | £2,395                          |               |
| 2006             | £1,851,883     | 520                 | 2376                            | £779                            |               |
| 2007             | £1,023,629     | 550                 | 2591                            | £395                            |               |
| 2008             | £3,449,233     | 538                 | 2868                            | £1,203                          |               |
| 2009             | £5,389,863     | 660                 | 3000                            | £1,797                          |               |
| 2010             | £1,345,555     | 628                 | n/a                             | n/a                             |               |
| 2011             | £9,763,953     | 765                 | n/a                             | n/a                             |               |
| 2012             | £13,853,844    | 815                 | n/a                             | n/a                             |               |
| 2013             | £5,231,327     | 792                 | n/a                             | n/a                             |               |

| <b>Influenza</b> |                |                     |                                 |                                 | <b>Median</b> |
|------------------|----------------|---------------------|---------------------------------|---------------------------------|---------------|
| <b>Year</b>      | <b>Funding</b> | <b>Publications</b> | <b>Likely publication yield</b> | <b>UK pound per publication</b> |               |
| 1997             | £883,670       | 109                 | 534                             | £1,654.81                       | £4,100.98     |
| 1998             | £484,374       | 109                 | 631                             | £767.63                         |               |
| 1999             | £228,798       | 136                 | 729                             | £313.85                         |               |
| 2000             | £16,078,950    | 142                 | 801                             | £20,073.60                      |               |
| 2001             | £1,217,786     | 147                 | 870                             | £1,399.75                       |               |
| 2002             | £4,096,880     | 206                 | 999                             | £4,100.98                       |               |
| 2003             | £5,853,947     | 234                 | 1076                            | £5,440.47                       |               |
| 2004             | £2,023,391     | 214                 | 1171                            | £1,727.92                       |               |
| 2005             | £3,290,717     | 216                 | 1425                            | £2,309.28                       |               |
| 2006             | £10,130,172    | 335                 | 1544                            | £6,560.99                       |               |
| 2007             | £7,501,049     | 311                 | 1744                            | £4,301.06                       |               |
| 2008             | £18,475,510    | 309                 | 1920                            | £9,622.66                       |               |
| 2009             | £12,594,285    | 470                 | 1928                            | £6,532.31                       |               |
| 2010             | £4,643,920     | 454                 | n/a                             | n/a                             |               |
| 2011             | £5,902,736     | 511                 | n/a                             | n/a                             |               |
| 2012             | £9,225,380     | 485                 | n/a                             | n/a                             |               |
| 2013             | £24,011,586    | 478                 | n/a                             | n/a                             |               |

### Tuberculosis

| Year | Funding     | Publications | Likely publication yield | UK pound per publication | Median    |
|------|-------------|--------------|--------------------------|--------------------------|-----------|
| 1997 | £3,186,842  | 267          | 1270                     | £2,509.32                | £6,335.16 |
| 1998 | £3,857,881  | 247          | 1386                     | £2,783.46                |           |
| 1999 | £4,811,164  | 307          | 1481                     | £3,248.59                |           |
| 2000 | £24,590,798 | 375          | 1554                     | £15,824.19               |           |
| 2001 | £14,365,240 | 341          | 1665                     | £8,627.77                |           |
| 2002 | £12,207,956 | 363          | 1855                     | £6,581.11                |           |
| 2003 | £6,428,730  | 402          | 2004                     | £3,207.95                |           |
| 2004 | £5,187,605  | 448          | 2103                     | £2,466.76                |           |
| 2005 | £32,623,643 | 452          | 2219                     | £14,701.96               |           |
| 2006 | £15,655,552 | 553          | 2269                     | £6,899.76                |           |
| 2007 | £15,533,817 | 551          | 2452                     | £6,335.16                |           |
| 2008 | £17,473,298 | 547          | 2570                     | £6,798.95                |           |
| 2009 | £5,052,460  | 568          | 2772                     | £1,822.68                |           |
| 2010 | £7,016,474  | 603          | n/a                      | n/a                      |           |
| 2011 | £19,831,601 | 734          | n/a                      | n/a                      |           |
| 2012 | £13,025,753 | 665          | n/a                      | n/a                      |           |
| 2013 | £38,253,590 | 770          | n/a                      | n/a                      |           |

Influenza citations per year and by article type

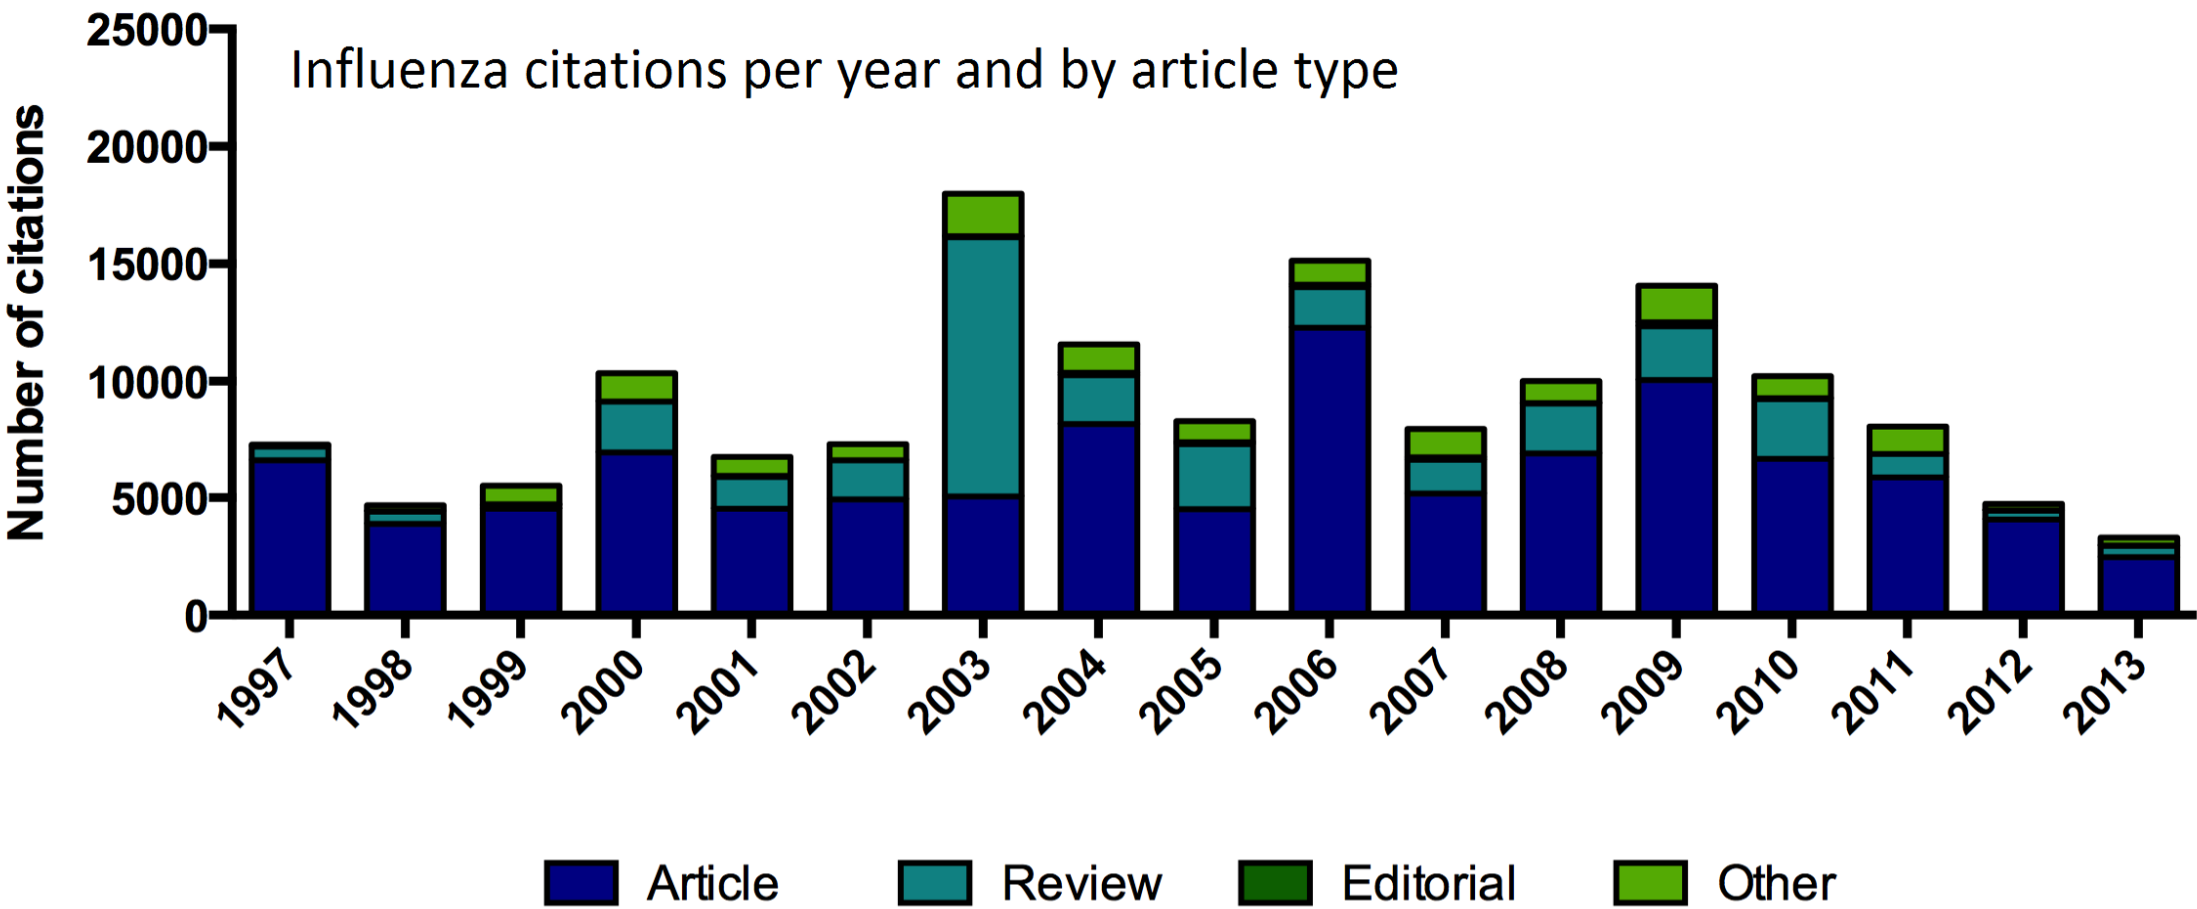

Influenza publications by year and article type

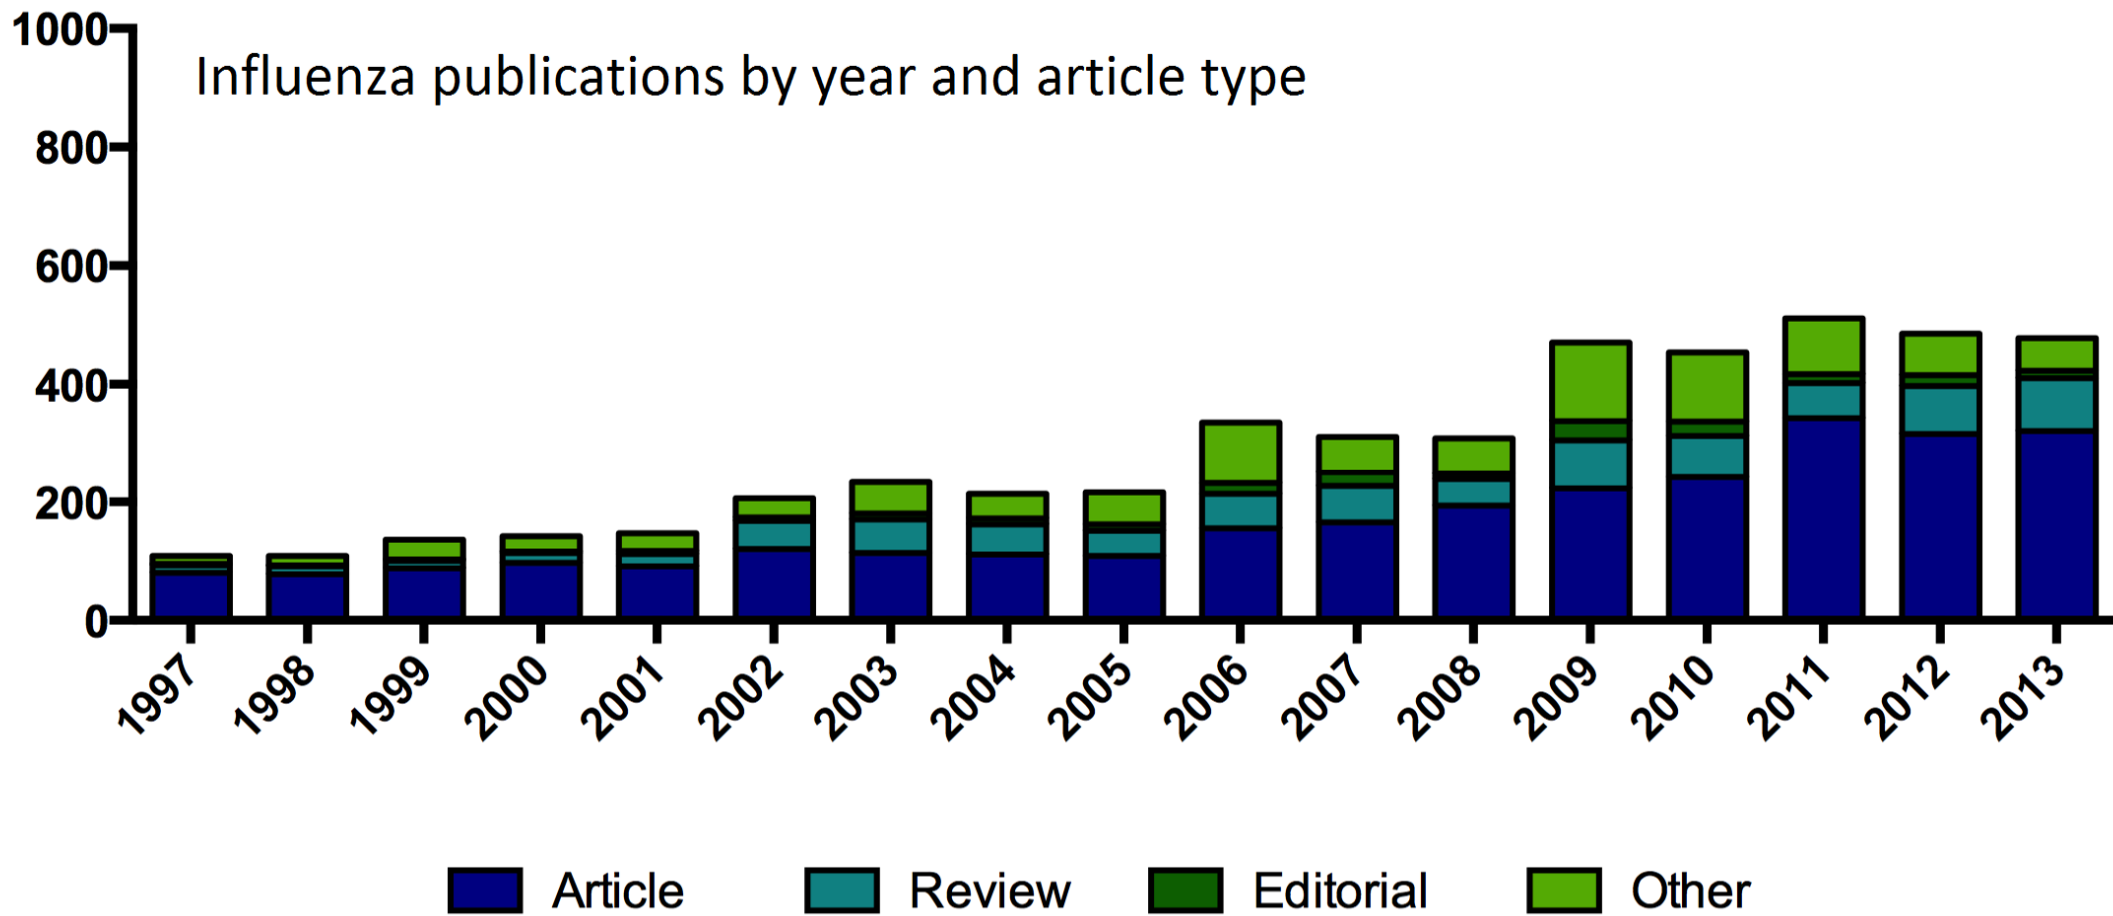

Tuberculosis citations per year and by article type

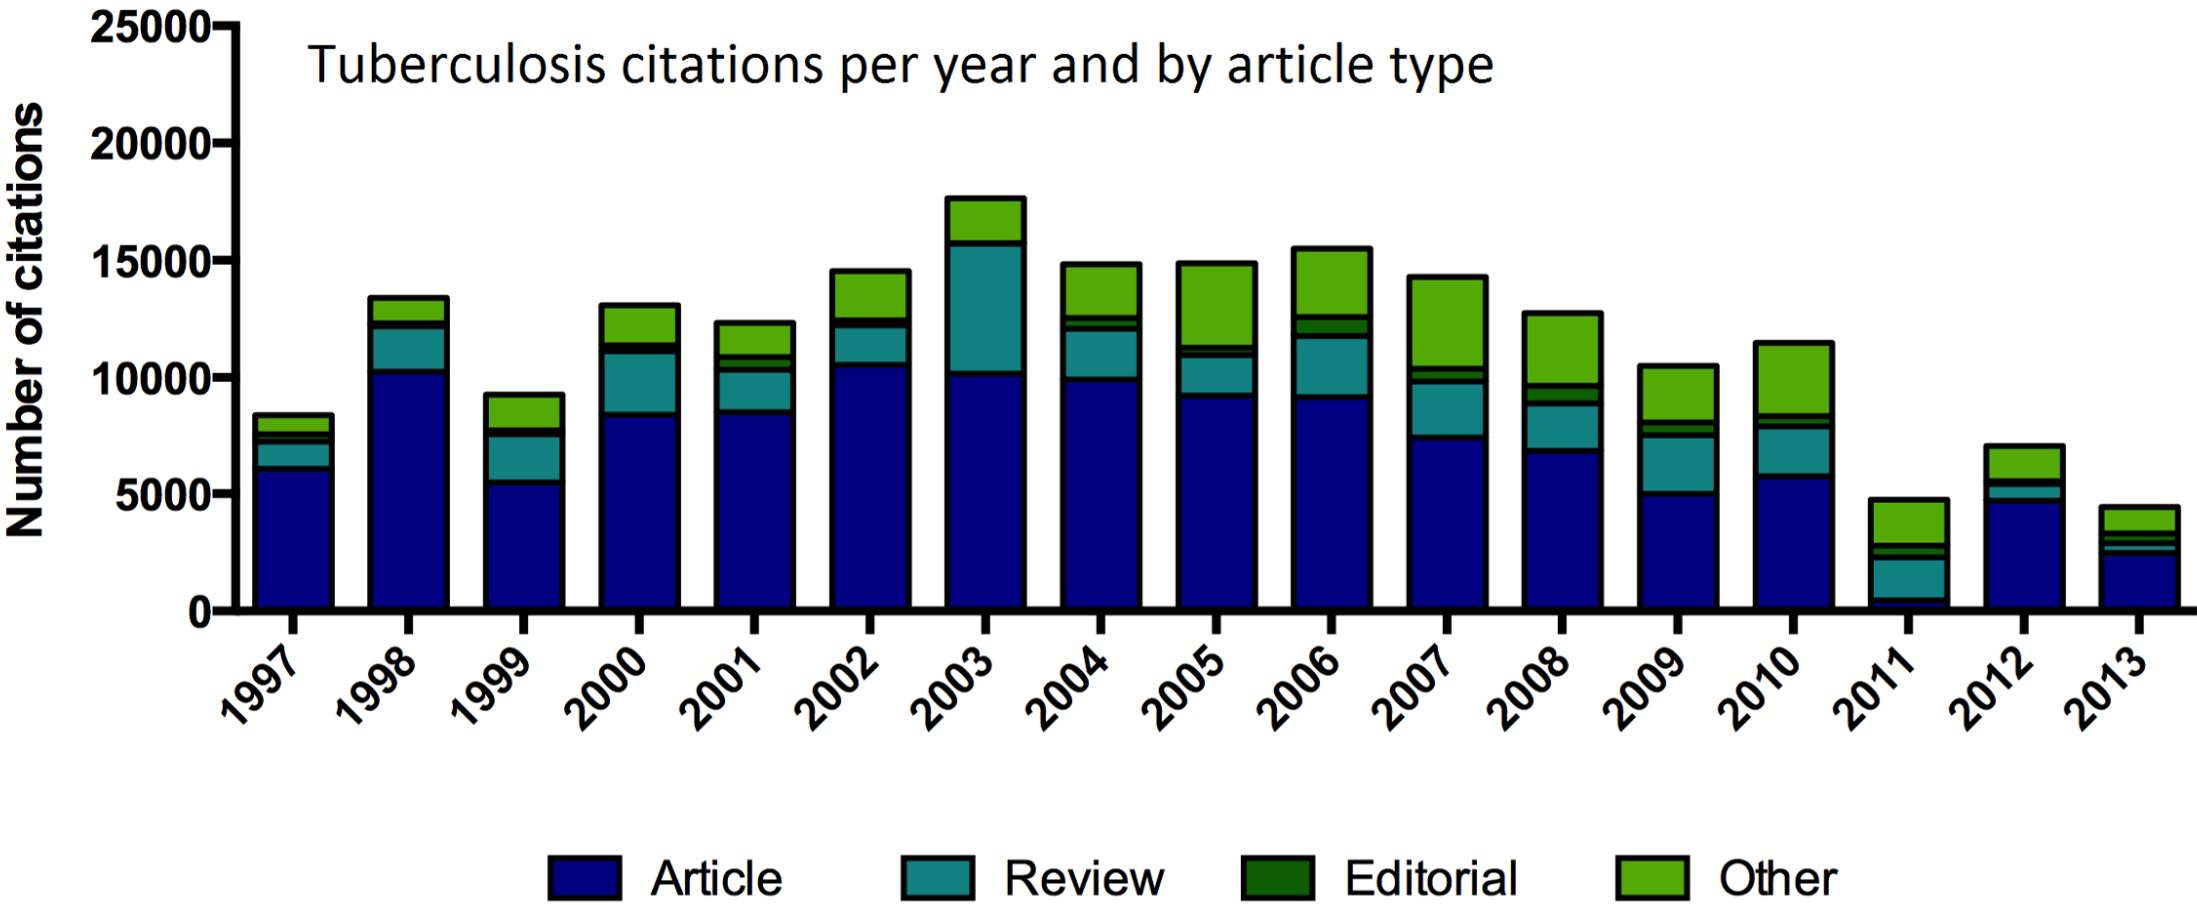

Tuberculosis publications per year and by article type

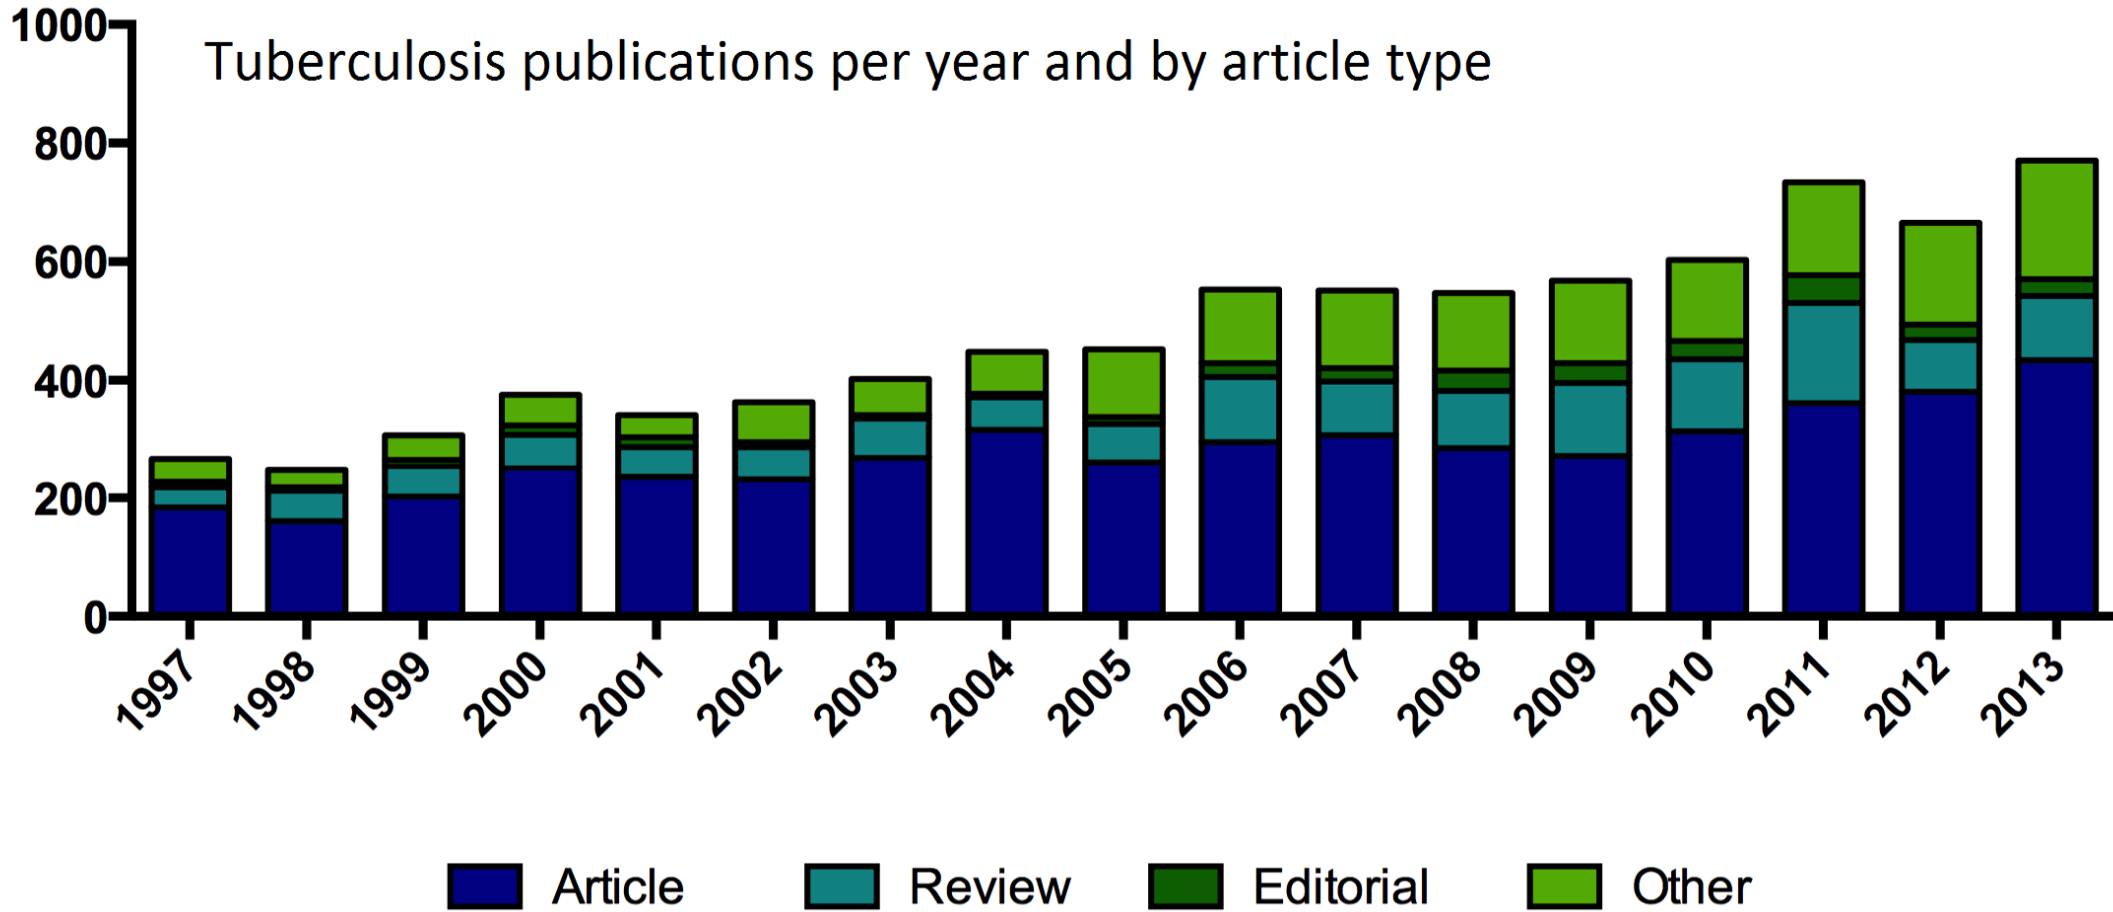

Supplement: mmc1 [file mmc1.pdf]
